# Supplementary material
Source: ML conference proceedings conference paper supplement (https://openreview.net/forum?id=b2u1yrTwFK)
Supplement: supplementary_material [file object_centric_world_model_appendix.pdf › object_centric_world_model_appendix.pdf]

Table 3: The Architecture and Hyperparameters of Encoder Learning.

| Name                        | Value                        |           |         |           |        |       |           |
|-----------------------------|------------------------------|-----------|---------|-----------|--------|-------|-----------|
|                             | bigfish                      | caveflyer | coinrun | dodgeball | jumper | ninja | starpilot |
| # slots                     | 31                           | 63        | 31      | 31        | 31     | 47    | 47        |
| slot dimension              | 256                          |           |         |           |        |       |           |
| # slot attention iterations | 3                            |           |         |           |        |       |           |
| image size                  | [224, 224, 3]                |           |         |           |        |       |           |
| patch size                  | 16                           |           |         |           |        |       |           |
| optimizer                   | Adam                         |           |         |           |        |       |           |
| learning rate               | 4e-4                         |           |         |           |        |       |           |
| data size                   | 1M                           |           |         |           |        |       |           |
| epoch                       | 15                           |           |         |           |        |       |           |
| batch size                  | 64                           |           |         |           |        |       |           |
| Cosmos model                | Cosmos-0.1-Tokenizer-CI16x16 |           |         |           |        |       |           |

Table 4: The Architecture and Hyperparameters of Dynamics Learning.

| Name                      | Value |
|---------------------------|-------|
| dynamic feature dimension | 256   |
| static feature dimension  | 256   |
| self-attention # layers   | 1     |
| self-attention model size | 512   |
| self-attention # heads    | 8     |
| SSM # layers              | 2     |
| SSM model size            | 512   |
| SSM $d_{state}$           | 64    |
| SSM $d_{conv}$            | 4     |
| optimizer                 | Adam  |
| learning rate             | 1e-4  |
| batch size                | 32    |

## A Method Details

### A.1 Encoder

The architecture and hyperparameter used during encoder training are shown in Table. 3.

### A.2 Dynamics

During dynamic feature training, the slot reconstruction loss and the disentanglement loss may have conflicting gradient and hinder model learning. To mitigate this issue, we leverage gradient modification [24] to enhance the balance between two objectives.

The architecture and hyperparameter used during encoder training are shown in Table. 4.

## B Experiment Details

### B.1 Evaluating Object-Centric Representation

The object-centric representation evaluation for 4 procgen environments are shown in Table. 5 and Fig. 7. By leveraging segmentation masks only during training, Dyn-O significantly outperforms SOLV in all environments, in terms of slot-object binding accuracy.

### B.2 Evaluating World Model Accuracy

The world model accuracy for other procgen environments are shown in Table. 6 and Fig. 8 - Fig. 10. In most environments, Dyn-O significantly outperforms baselines in term of prediction accuracy.

Table 5: slot-object binding accuracy, measured by FR-ARI ( $\uparrow$ ).

| Environments | Oracle | Dyn-O (ours) | SOLV |
|--------------|--------|--------------|------|
| bigfish      | 0.96   | 0.80         | 0.54 |
| coinrun      | 0.33   | 0.27         | 0.10 |
| dodgeball    | 0.79   | 0.48         | 0.17 |
| starpilot    | 0.86   | 0.47         | 0.49 |
| average      | 0.74   | 0.51         | 0.33 |

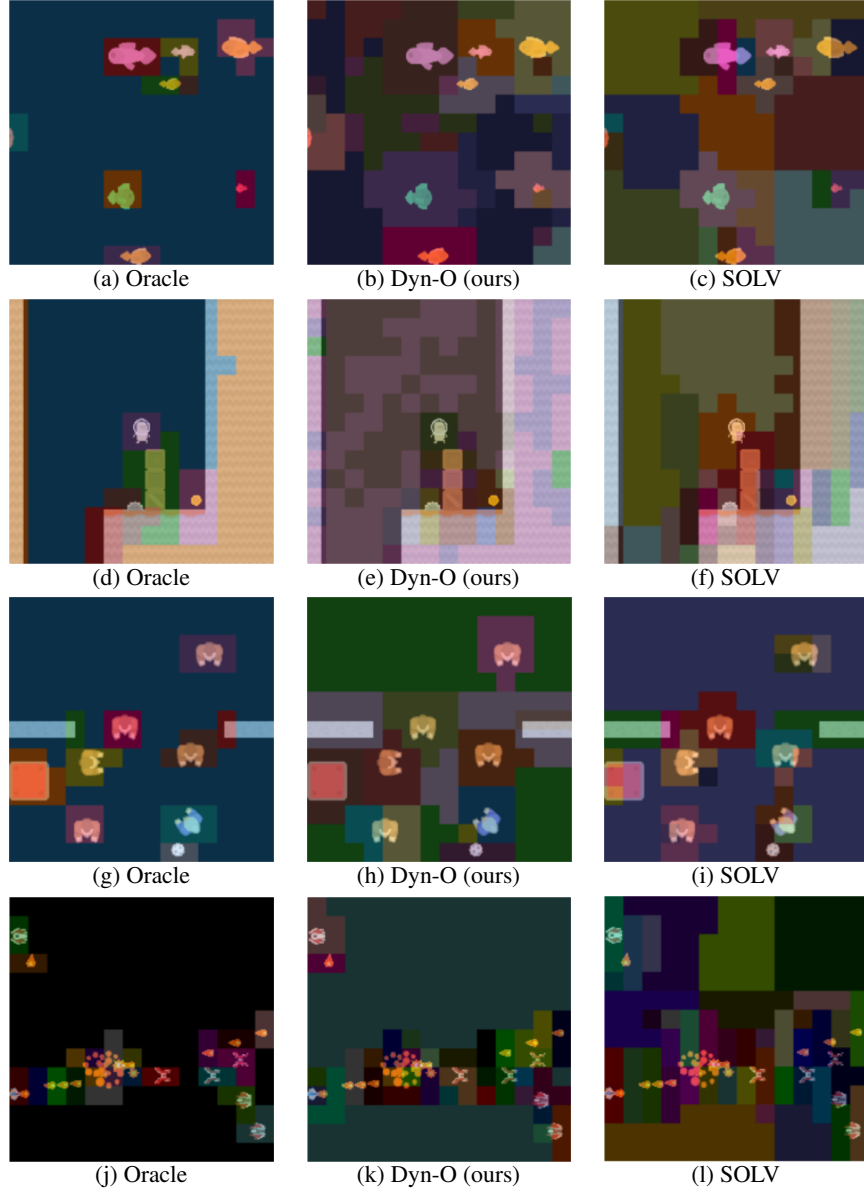

Figure 7: Qualitative evaluation of the object-centric representation learning in **bigfish**, **coinrun**, **dodgeball**, and **starpilot**.

### 410 B.3 Evaluating Static-Dynamic Disentanglement

411 The probing accuracy for other progen environments are shown in Table. 7 - 10. The same privilege  
 412 information may belong to different properties in different environments, which we label out in the

Table 6: Rollout accuracy at 20-th timestamp, measured as mean and standard error.

| Environment | Metric                 | DreamerV3                          | Dyn-O w/o OC                       | Dyn-O (ours)                         |
|-------------|------------------------|------------------------------------|------------------------------------|--------------------------------------|
| bigfish     | LPIPS ( $\downarrow$ ) | $0.39 \pm 0.01$                    | $0.36 \pm 0.01$                    | <b><math>0.25 \pm 0.01</math></b>    |
|             | FVD ( $\downarrow$ )   | $567.20 \pm 11.18$                 | $248.94 \pm 16.32$                 | <b><math>126.88 \pm 6.42</math></b>  |
|             | SSIM ( $\uparrow$ )    | $0.73 \pm 0.01$                    | $0.68 \pm 0.01$                    | <b><math>0.76 \pm 0.01</math></b>    |
|             | PSNR ( $\uparrow$ )    | $19.34 \pm 0.14$                   | <b><math>20.16 \pm 0.27</math></b> | <b><math>20.28 \pm 0.30</math></b>   |
| caveflyer   | LPIPS ( $\downarrow$ ) | <b><math>0.53 \pm 0.01</math></b>  | $0.59 \pm 0.01$                    | $0.61 \pm 0.01$                      |
|             | FVD ( $\downarrow$ )   | $1104.50 \pm 18.87$                | $966.07 \pm 28.71$                 | <b><math>877.74 \pm 20.99</math></b> |
|             | SSIM ( $\uparrow$ )    | <b><math>0.44 \pm 0.01</math></b>  | $0.26 \pm 0.01$                    | $0.26 \pm 0.01$                      |
|             | PSNR ( $\uparrow$ )    | <b><math>11.99 \pm 0.12</math></b> | $10.93 \pm 0.19$                   | $10.82 \pm 0.13$                     |
| coinrun     | LPIPS ( $\downarrow$ ) | $0.34 \pm 0.01$                    | $0.36 \pm 0.01$                    | <b><math>0.28 \pm 0.01</math></b>    |
|             | FVD ( $\downarrow$ )   | $530.31 \pm 10.51$                 | $583.11 \pm 16.07$                 | <b><math>266.13 \pm 6.16</math></b>  |
|             | SSIM ( $\uparrow$ )    | $0.60 \pm 0.01$                    | $0.47 \pm 0.01$                    | <b><math>0.62 \pm 0.01</math></b>    |
|             | PSNR ( $\uparrow$ )    | <b><math>14.22 \pm 0.25</math></b> | $12.61 \pm 0.14$                   | $13.56 \pm 0.19$                     |
| dodgeball   | LPIPS ( $\downarrow$ ) | $0.42 \pm 0.01$                    | $0.15 \pm 0.01$                    | <b><math>0.14 \pm 0.01</math></b>    |
|             | FVD ( $\downarrow$ )   | $903.51 \pm 20.44$                 | $481.55 \pm 20.83$                 | <b><math>372.50 \pm 15.07</math></b> |
|             | SSIM ( $\uparrow$ )    | $0.50 \pm 0.01$                    | $0.72 \pm 0.01$                    | <b><math>0.76 \pm 0.01</math></b>    |
|             | PSNR ( $\uparrow$ )    | $16.10 \pm 0.05$                   | $20.33 \pm 0.12$                   | <b><math>20.88 \pm 0.15</math></b>   |
| ninja       | LPIPS ( $\downarrow$ ) | $0.48 \pm 0.01$                    | $0.49 \pm 0.01$                    | <b><math>0.45 \pm 0.01</math></b>    |
|             | FVD ( $\downarrow$ )   | $423.27 \pm 14.26$                 | $521.32 \pm 15.85$                 | <b><math>313.57 \pm 9.73</math></b>  |
|             | SSIM ( $\uparrow$ )    | $0.45 \pm 0.01$                    | $0.33 \pm 0.01$                    | <b><math>0.54 \pm 0.01</math></b>    |
|             | PSNR ( $\uparrow$ )    | $12.58 \pm 0.17$                   | <b><math>12.80 \pm 0.10</math></b> | $11.95 \pm 0.12$                     |
| starpilot   | LPIPS ( $\downarrow$ ) | $0.37 \pm 0.01$                    | $0.50 \pm 0.01$                    | <b><math>0.22 \pm 0.01</math></b>    |
|             | FVD ( $\downarrow$ )   | $626.47 \pm 14.95$                 | $429.36 \pm 15.46$                 | <b><math>211.27 \pm 12.70</math></b> |
|             | SSIM ( $\uparrow$ )    | $0.69 \pm 0.01$                    | $0.72 \pm 0.01$                    | <b><math>0.76 \pm 0.01</math></b>    |
|             | PSNR ( $\uparrow$ )    | $19.99 \pm 0.08$                   | $19.76 \pm 0.23$                   | <b><math>20.55 \pm 0.13</math></b>   |

Table 7: Probing accuracy ( $\uparrow$ ), in percentage (%), on **bigfish** privilege properties.

|                  | mean R values<br>static | mean G values<br>static | mean B values<br>static | x position<br>dynamic | y position<br>static | area<br>static  |
|------------------|-------------------------|-------------------------|-------------------------|-----------------------|----------------------|-----------------|
| slots            | $74.7 \pm 0.0$          | $77.9 \pm 0.0$          | $83.8 \pm 0.0$          | $97.7 \pm 0.0$        | $98.3 \pm 0.0$       | $100.0 \pm 0.0$ |
| dynamic features | $49.3 \pm 3.0$          | $48.4 \pm 2.4$          | $47.4 \pm 3.7$          | $94.0 \pm 1.9$        | $45.2 \pm 5.1$       | $95.9 \pm 1.2$  |
| static features  | $65.8 \pm 4.2$          | $67.6 \pm 4.8$          | $77.5 \pm 1.2$          | $29.3 \pm 0.4$        | $88.8 \pm 0.7$       | $100.0 \pm 0.0$ |
| random features  | $37.6 \pm 0.0$          | $31.8 \pm 0.0$          | $37.3 \pm 0.0$          | $19.2 \pm 0.0$        | $20.8 \pm 0.0$       | $88.6 \pm 0.0$  |

413 tables. In some environments, the same privilege information can be static properties of some objects  
414 and can dynamic for other objects. In such case, we mark such privilege information as "mixed".

Table 8: Probing accuracy ( $\uparrow$ ), in percentage (%), on **dodgeball** privilege properties.

|                  | mean R values<br>static | mean G values<br>static | mean B values<br>static | x position<br>mixed | y position<br>mixed | area<br>static |
|------------------|-------------------------|-------------------------|-------------------------|---------------------|---------------------|----------------|
| slots            | $90.2 \pm 0.0$          | $91.7 \pm 0.0$          | $91.2 \pm 0.0$          | $98.7 \pm 0.0$      | $98.7 \pm 0.0$      | $99.8 \pm 0.0$ |
| dynamic features | $66.0 \pm 1.6$          | $62.4 \pm 1.2$          | $61.1 \pm 1.8$          | $55.4 \pm 1.8$      | $57.7 \pm 2.5$      | $95.3 \pm 1.7$ |
| static features  | $73.1 \pm 1.2$          | $74.2 \pm 1.4$          | $75.5 \pm 1.7$          | $74.9 \pm 2.4$      | $70.4 \pm 2.9$      | $99.3 \pm 0.0$ |
| random features  | $53.3 \pm 0.0$          | $35.5 \pm 0.0$          | $42.9 \pm 0.0$          | $20.1 \pm 0.0$      | $19.7 \pm 0.0$      | $90.1 \pm 0.0$ |

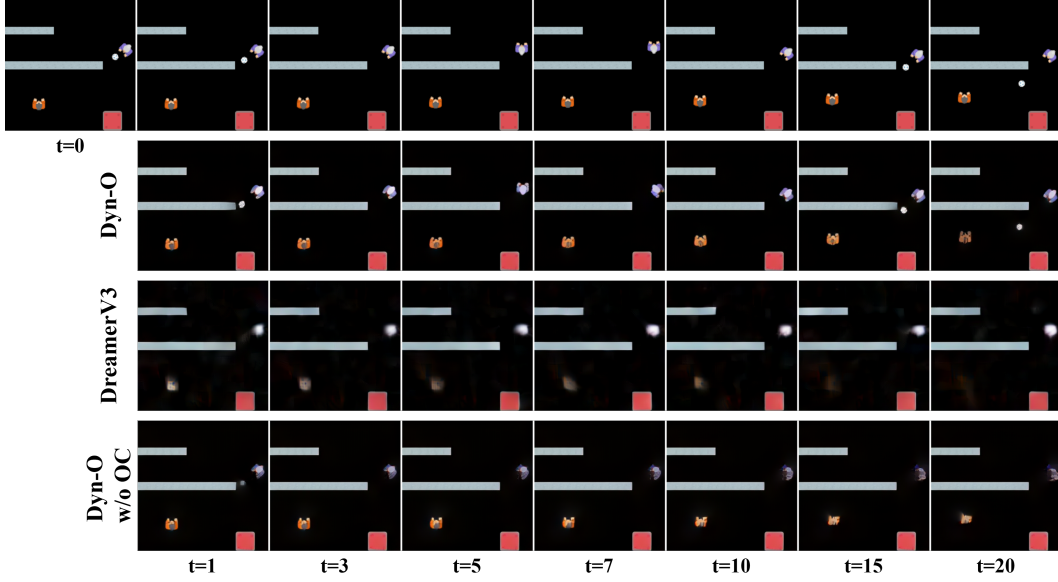

Figure 8: 20-step rollouts in **dodgeball**. **1st** row: ground-truth, **2nd** row: Dyn-O (ours), **3rd** row: DreamerV3, and **4th** row: Dyn-O w/o OC. Dyn-O significantly outperforms dreamer, with sharp player shape and accurate predictions of threw balls.

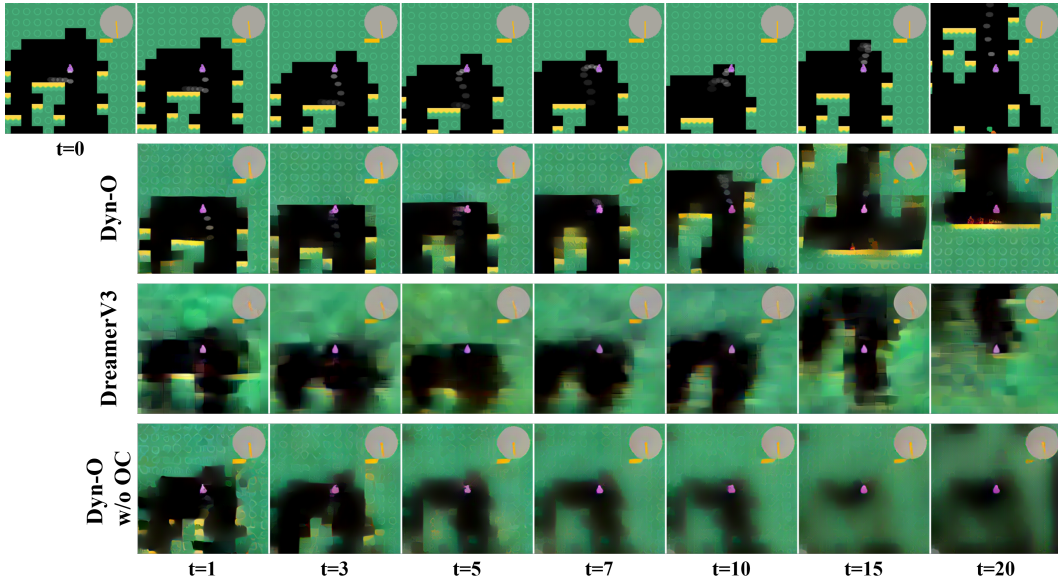

Figure 9: 20-step rollouts in **jumper**. **1st** row: ground-truth, **2nd** row: Dyn-O (ours), **3rd** row: DreamerV3, and **4th** row: Dyn-O w/o OC. Dyn-O significantly outperforms dreamer, with sharp wall and player trail until 10th timestamp.

Table 9: Probing accuracy ( $\uparrow$ ), in percentage (%), on **ninja** privilege properties.

|                  | mean R values<br>static | mean G values<br>static | mean B values<br>static | x position<br>dynamic | y position<br>dynamic | area<br>dynamic |
|------------------|-------------------------|-------------------------|-------------------------|-----------------------|-----------------------|-----------------|
| slots            | $87.1 \pm 0.0$          | $80.7 \pm 0.0$          | $86.1 \pm 0.0$          | $95.0 \pm 0.0$        | $96.6 \pm 0.0$        | $97.3 \pm 0.0$  |
| dynamic features | $60.7 \pm 9.7$          | $51.3 \pm 8.2$          | $60.6 \pm 9.0$          | $86.3 \pm 3.0$        | $88.1 \pm 0.3$        | $87.6 \pm 2.2$  |
| static features  | $77.6 \pm 2.9$          | $62.2 \pm 0.4$          | $79.6 \pm 0.4$          | $35.9 \pm 0.9$        | $37.8 \pm 1.1$        | $82.2 \pm 1.3$  |
| random features  | $32.9 \pm 0.0$          | $25.4 \pm 0.0$          | $31.3 \pm 0.0$          | $25.0 \pm 0.0$        | $19.5 \pm 0.0$        | $80.5 \pm 0.0$  |



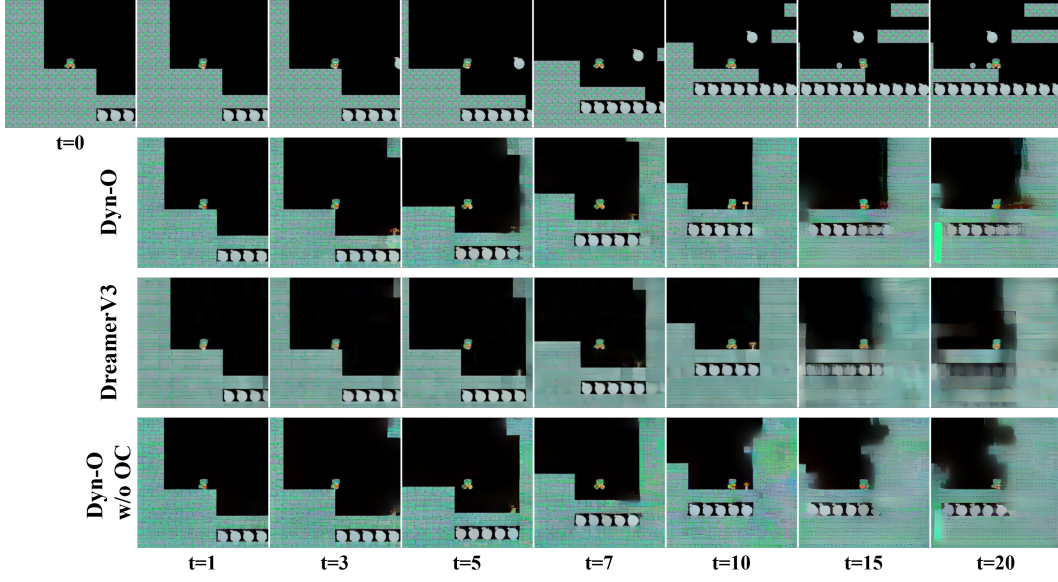

Figure 10: 20-step rollouts in **ninja**. **1st** row: ground-truth, **2nd** row: Dyn-O (ours), **3rd** row: DreamerV3, and **4th** row: Dyn-O w/o OC. Dyn-O significantly outperforms dreamer, with sharper wall shape at 15-th timestamp.

Table 10: Probing accuracy ( $\uparrow$ ), in percentage (%), on **starpilot** privilege properties.

|                  | mean R values<br>static | mean G values<br>static | mean B values<br>static | x position<br>dynamic | y position<br>static | area<br>static |
|------------------|-------------------------|-------------------------|-------------------------|-----------------------|----------------------|----------------|
| slots            | $71.5 \pm 0.0$          | $79.1 \pm 0.0$          | $71.0 \pm 0.0$          | $97.2 \pm 0.0$        | $97.5 \pm 0.0$       | $99.5 \pm 0.0$ |
| dynamic features | $55.6 \pm 7.2$          | $66.5 \pm 6.4$          | $55.3 \pm 6.2$          | $94.8 \pm 0.9$        | $77.0 \pm 14.2$      | $97.9 \pm 1.7$ |
| static features  | $55.9 \pm 1.1$          | $70.7 \pm 1.1$          | $50.5 \pm 1.8$          | $26.8 \pm 0.7$        | $76.6 \pm 3.2$       | $99.2 \pm 0.0$ |
| random features  | $35.9 \pm 0.0$          | $50.6 \pm 0.0$          | $36.3 \pm 0.0$          | $18.3 \pm 0.0$        | $22.7 \pm 0.0$       | $92.0 \pm 0.0$ |
